# Exercise Alone Reduces Insulin Resistance in Obese Children Independently of Changes in Body Composition

Lana M. Bell, Katie Watts, Aris Siafarikas, Alisha Thompson, Nirubasini Ratnam, Max Bulsara, Judith Finn, Gerry O'Driscoll, Daniel J. Green, Timothy W. Jones, and Elizabeth A. Davis

*Telethon Institute for Child Health Research, Centre for Child Health Research (L.M.B., K.W., A.T., N.R., M.B., T.W.J., E.A.D.), and Schools of Population Health (L.M.B., M.B., J.F.) and Human Movement and Exercise Science (K.W., G.O.), University of Western Australia, Crawley, Western Australia 6009, Australia; Department of Endocrinology and Diabetes (L.M.B., A.S., A.T., T.W.J., E.A.D.), Princess Margaret Hospital, Subiaco, Western Australia, Australia 6008; Advanced Heart Failure and Cardiac Transplant Service (G.O.), Royal Perth Hospital, Perth, Western Australia 6001, Australia; and School of Medicine (G.O.), University of Notre Dame, Fremantle, Western Australia 6959, Australia; and Research Institute for Sport and Exercise Sciences (D.J.G.), Liverpool John Moores University, Liverpool L3 5UX, United Kingdom*

**Context:** The number of obese children with insulin resistance and type 2 diabetes is increasing, but the best management strategy is not clear.

**Objective:** The objective of this study was to assess the effect of a structured 8-wk exercise training program on insulin resistance and changes in body composition in obese children.

**Design:** The study was 8 wk of structured supervised exercise intervention with outcome measures before and after the exercise period.

**Subjects:** Fourteen obese children ( $12.70 \pm 2.32$  yr; eight male, six female) with high fasting insulin levels were enrolled into the study.

**Intervention:** Intervention consisted of 8 wk of supervised circuit-based exercise training, composed of three fully supervised 1-h sessions per week.

**Outcome Measures:** Outcome measures were assessed pretraining program and posttraining program and included insulin sensitivity (euglycemic-hyperinsulinemic clamp studies), fasting insulin and glucose levels, body composition using dual energy x-ray absorptiometry scan, lipid profile, and liver function tests.

**Results:** Insulin sensitivity improved significantly after 8 wk of training ( $M_{ibm}$   $8.20 \pm 3.44$  to  $10.03 \pm 4.33$  mg/kg-min,  $P < 0.05$ ). Submaximal exercise heart rate responses were significantly lower following the training ( $P < 0.05$ ), indicating an improvement in cardiorespiratory fitness. Dual energy x-ray absorptiometry scans revealed no differences in lean body mass or abdominal fat mass.

**Conclusion:** An 8-wk exercise training program increases insulin sensitivity in obese children, and this improvement occurred in the presence of increased cardiorespiratory fitness but is independent of measurable changes in body composition. (*J Clin Endocrinol Metab* 92: 4230–4235, 2007)

COMPLICATIONS OF OVERWEIGHT and obesity are becoming major health care issues due to the increasing prevalence of childhood obesity and overweight. Possibly the largest health burden will result from type 2 diabetes mellitus (T2DM) and cardiovascular disease. Previously considered a disease of adults, T2DM is now increasing in children (1–3).

Insulin resistance precedes the development of T2DM; resultant high insulin levels and gradual development of impaired glucose tolerance are disease precursors (4). In adults, abdominal adiposity is associated with insulin resistance and T2DM (5–7), and the evidence for this in childhood is increasing (8–11). Similarly, insulin resistance, measured via euglycemic-hyperinsulinemic clamp studies, has been shown to improve with exercise programs over time in adult subjects (12–14). However data on the impact of exercise training on insulin resistance in overweight and obese children are limited.

Most studies have used a cross-sectional analysis to examine insulin resistance in children of different fitness levels (15, 16) or with different levels of self-reported physical activity (15, 17). These studies have found that those who report greater levels of physical activity have lower insulin levels and, by inference, greater insulin sensitivity (17).

Some exercise intervention studies, in youth, using fasting insulin or oral glucose tolerance tests (OGTT) as measures of insulin resistance, have suggested a decrease in insulin resistance after exercise, but the effect was not quantifiable due to methodological limitations (18, 19). In children, there are no published longitudinal studies that have examined the effect of exercise training on insulin resistance or hyperinsulinism. Furthermore, no studies in children have examined changes in insulin resistance together with changes in body composition.

Euglycemic-hyperinsulinemic clamp techniques have been used in children to quantify insulin resistance in obesity; however, these have been cross-sectional studies.

In the present study, sedentary obese children with high fasting insulin levels were recruited to an 8-wk controlled exercise training program. Outcome measures included body composition, fitness, and insulin resistance.

First Published Online August 14, 2007

Abbreviations: BMI, Body mass index; DEXA, dual energy x-ray absorptiometry; OGTT, oral glucose tolerance test; T2DM, type 2 diabetes.

JCEM is published monthly by The Endocrine Society (<http://www.endo-society.org>), the foremost professional society serving the endocrine community.

## Subjects and Methods

### Subjects

Sedentary obese children and adolescents aged between 9 and 16 yr were recruited from tertiary referral clinics. All children were above the 95th percentile for body mass index (BMI) for age (20), and all had elevated fasting insulin levels greater than 12.0 mU/liter (but normal fasting glucose) before commencement of the study. Exclusion criteria included secondary obesity, underlying genetic syndrome, and T2DM. The study was approved by the Princess Margaret Hospital Ethics Committee, and written informed consent was obtained from the parent and assent was obtained from the child or adolescent.

### Exercise training intervention

The intervention comprised of 8 wk of group “circuit” exercise training involving three 1-h sessions per week, fully supervised by a trained Exercise Physiologist, for a total of 24 sessions. The sessions were circuit-based, involving mixed aerobic and resistance (modified for age) stations. A circuit consisted of aerobic cycle ergometer exercise, alternated with exercise performed on weight-stack machines (Pulsestar, Cheshire, UK). After a 10-min warm-up period of stretching and low-intensity cycle or treadmill exercise, each exercise session would begin with 1 min of cycle ergometry (initially maintained at 65% of maximum heart rate, progressed to 85% by wk 3) followed, at the sound of a buzzer, by movement to the first weight stack machine (12 repetitions per minute, initially maintained at ~55% of pretraining maximum voluntary contraction, progressed to ~65% by wk 3). After a minute of exercise on this machine, subjects returned to the cycle ergometer and the circuit continued until all 10 machine stations were completed. Subjects completed two sets of this circuit at each of the three weekly visits to the gymnasium for 8 wk. Inclusive of the final 10-min cool down period, the exercise sessions lasted approximately 60 min. To address the issue of relative exercise intensity, individual measurements of maximal strength were made for each of the resistance exercise stations and we determined age-predicted maximal exercise heart rate data. All subjects then exercised at individualized absolute workloads and resistances, but exercise was matched between subjects in relative terms.

Throughout the study period, the children were asked to maintain a healthy diet, but no standard dietary modifications were made to gauge the effect of added exercise alone to the child’s lifestyle.

### Assessment

Pretraining period and posttraining period medical assessment and insulin sensitivity was carried out by the same physician investigator (L.M.B.). Medical and family history, physical examination, anthropometric measurements, and Tanner staging were performed. Weight, height, waist and hip circumference, and blood pressure were measured and BMI was calculated as weight/height<sup>2</sup> and expressed as kilograms per square meter. Age- and sex-specific BMI z-scores were calculated from the 2000 Centers for Disease Control and Prevention Growth Reference, USA (21). All anthropometric parameters were obtained by taking the average of three sequential measurements.

Body composition was measured by whole-body dual energy x-ray absorptiometry (DEXA), using the Norland XR36 Quickscan DEXA scanner. Total lean mass, total fat mass, and percentage body fat was obtained for each subject, as well as lean and fat mass by body compartment. Five body compartments were used (head, trunk, abdomen, upper limbs, and lower limbs) as defined by bony landmarks. This analysis was performed blind by an independent investigator.

Before and after the 8-wk training period, a submaximal exercise test was performed in each subject consisting of three consecutive 4-min incremental epochs of exercise on a braked bicycle ergometer (Monark, Varberg, Sweden) with subjects continuously cycling at 50–60 revolutions per minute. Heart rate was continuously measured in beats per minute by telemetric method (Polar Electro, Kempele, Finland). Identical exercise intensities were used before and after exercise training in each subject and changes in fitness were assessed by comparing heart rate responses at these matched workloads.

### Euglycemic-hyperinsulinemic clamp tests

Insulin sensitivity was measured by the euglycemic-hyperinsulinemic clamp technique. All clamp tests were performed not less than 48 h after completion of the last training session, to decrease the possibility of an acute impact of the final exercise bout. Each subject was admitted to the research center at 0800 h after an overnight fast and had two 18-gauge iv cannulae placed. One cannula was inserted into the dorsum of the hand for sampling blood glucose, and one into the contralateral cubital fossa for infusion of both a standard 60 mU/m<sup>2</sup>·min of insulin, and variable rate infusion of 20% dextrose. At baseline, blood was obtained for fasting insulin and glucose samples, fasting lipid profile, and liver function tests. The insulin infusion was commenced at time 0, and the blood glucose level of the subject was taken from the sampling line at 5-min intervals and analyzed immediately using a YSI 2300 Stat Plus glucose and lactate analyzer. The 20% dextrose infusion was titrated accordingly to keep the blood glucose level of the subject at 5.0 mmol/liter. All calculations were performed on the results from time 120–180 min of the clamp, when steady state had been achieved. “M<sub>(lbm)</sub>” was calculated as the measure of insulin sensitivity, defined as the milligrams of glucose infused per kilogram of lean body mass per minute to keep blood glucose at 5.0 mmol/liter during the steady-state period.

### Measurements and biochemistry

Weight was measured to two decimal places on a digital balance scale in light clothing without shoes. Height was measured to the nearest millimeter on a wall-mounted stadiometer. Weight and hip circumference were measured using a standard nonelastic tape measure to the nearest 0.5 cm. Blood pressure was measured in the seated position with a Critikon Dinamap 8262-H4139 and an appropriate size cuff.

Plasma glucose was measured using the colorimetric method (VITROS GLU; Ortho-Clinical Diagnostics, Rochester, NY). Plasma insulin was determined by chemiluminescent immunometric assay (IMMULITE 2000; Diamond Diagnostics, Holliston, MA). Cholesterol, high-density lipoprotein, low-density lipoprotein, triglycerides, and alanine aminotransferase were all measured by colorimetric method (VITROS CHOL and VITROS 250; Ortho-Clinical Diagnostics).

### Statistical analysis

All data are shown as mean ± SD or as percentages. Analysis was performed with the SPSS statistical package (SPSS, Chicago, IL) and Stata 8.0. The Wilcoxon signed ranks test was used to test the null hypothesis that there was no difference between the preexercise and postexercise data, due to the small number of subjects. Correlations were tested using Pearson’s or Spearman’s rank test as appropriate.

The study was powered to detect a 25% difference in insulin sensitivity (as measured by clamp test) using a paired study design, a type I error of 5%, and a power of 80% [based on the metabolic studies by Snehag *et al.* (22)].

Initially, DEXA results were reported as grams of lean mass and grams of fat mass for each subject. However, for comparisons to be made between subjects, DEXA results were converted to percentages of the total body weight of each individual. This allows meaningful comparisons of body composition changes between individuals of different age, sex, and body shape.

## Results

Fourteen subjects, eight males and six females, were enrolled (age 12.70 ± 2.32 yr). All subjects were obese (BMI 31.658 ± 4.436 kg/m<sup>2</sup> and BMI z-score 2.23 ± 0.30). There was no difference between males and females in age, BMI, or BMI z-score. Attendance for the 8-wk training period was over 87%. No subject missed more than four sessions.

### Anthropometric measures

Over the 8 wk of intervention there was a significant increase in height (1.59 vs. 1.60 m, *P* < 0.05) but no change in weight (80.6 vs. 81.2 kg, *P* = 0.47). BMI z-score (2.23 vs. 2.20,

**TABLE 1.** Anthropometric data, blood pressure, and fitness results for the cohort before and after the 8-wk exercise training period

|                               | Preexercise    | Postexercise   | <i>P</i> value     |
|-------------------------------|----------------|----------------|--------------------|
| N                             | 14             | 14             |                    |
| Height (m)                    | 1.59 ± 0.12    | 1.60 ± 0.11    | 0.003 <sup>a</sup> |
| Weight (kg)                   | 80.62 ± 19.20  | 81.20 ± 19.0   | 0.470              |
| BMI (kg/m <sup>2</sup> )      | 31.58 ± 4.36   | 31.19 ± 4.03   | 0.103              |
| BMI z-score                   | 2.23 ± 0.30    | 2.20 ± 0.30    | 0.032 <sup>a</sup> |
| Waist (cm)                    | 97.08 ± 13.70  | 94.82 ± 13.36  | 0.045 <sup>a</sup> |
| Hips (cm)                     | 106.34 ± 13.30 | 105.78 ± 14.27 | 0.700              |
| BP systolic (mm Hg)           | 109.14 ± 29.23 | 104.50 ± 31.17 | 0.555              |
| BP diastolic (mm Hg)          | 86.64 ± 25.79  | 83.14 ± 29.48  | 0.059              |
| Fitness test (heart rate bpm) | 164.54 ± 12.79 | 154.61 ± 8.97  | 0.011 <sup>a</sup> |

<sup>a</sup> *P* ≤ 0.05.

*P* < 0.05) and waist circumference decreased (*P* < 0.05), but BMI, hip girth, and systolic and diastolic blood pressure were unchanged (see Table 1).

### Body composition

Analysis of DEXA results by body compartment showed no significant differences between mean pretraining and posttraining body composition values (see Table 2) in either fat or lean body mass.

### Aerobic fitness

Submaximal exercise heart rate responses were significantly lower after the training period (*P* < 0.05), indicating an improvement in cardiorespiratory fitness. Differences were evident at the highest workload (work load 3: heart rate 165.27 ± 12.65 to 154.61 ± 8.98 bpm, *P* < 0.001).

### Insulin sensitivity

There was a wide range of pretraining  $M_{(lbm)}$  values (3.68 to 13.40 mg/kg·min, mean 8.20 ± 3.44 mg/kg·min). There was no significant correlation between the pretraining  $M_{(lbm)}$  and sex, age, or heart rate during the fitness test, or compartmental body composition. Posttraining  $M_{(lbm)}$  values ranged between 4.09–17.42 mg/kg·min, with a mean of 10.02 ± 4.33 mg/kg·min. There were no significant correlations between posttraining  $M_{(lbm)}$  and heart rate during the fitness test, or compartmental body composition data.

Insulin sensitivity improved after 8 wk of training (pretraining  $M_{(lbm)}$  vs. posttraining  $M_{(lbm)}$ : 8.20 mg/kg·min vs. 10.02 mg/kg·min, *P* < 0.05 (Fig. 1). There was no relationship between the degree of improvement in  $M_{(lbm)}$  and baseline insulin sensitivity.

There were no significant correlations of the change in

$M_{(lbm)}$  with gender, age, improvement in fitness, the number of sessions attended, change in weight, or change in BMI or BMI z score. There was also no correlation between  $M_{(lbm)}$  and degree of change in any parameter of body composition. Apart from insulin sensitivity, there were no other significant changes in fasting blood results (Table 3).

### Discussion

Insulin resistance is one of the major complications of obesity. There are now reports of increasing T2DM in children, and this is considered a consequence of increasing obesity rates.

This study has found that an 8-wk exercise training program improves insulin resistance in obese children in the presence of improved exercise capacity, but in the absence of changes in body weight or body composition. The baseline insulin sensitivity [ $M_{(lbm)}$ ] measurements taken in this study are similar to those measured in cross-sectional studies in children by other researchers (17, 23–25).

The strengths of this study include the involvement of a trained pediatric Exercise Physiologist and small numbers of subjects in each exercise session, resulting in high attendance rates (87%) and a high level of personal attention for each subject. The use of DEXA scans to define body compartments allowed the regional analysis of lean mass and fat mass. Although demanding and time-intensive, the use of euglycemic-hyperinsulinemic clamp tests as outcome measures has allowed us to detect changes in insulin sensitivity that would have been missed by using fasting insulin levels. Schmitz *et al.* (17) assessed the correlation between self-reported physical activity and insulin sensitivity in children using both a euglycemic-hyperinsulinemic clamp and fasting insulin in a cross-sectional study. They report mean values

**TABLE 2.** DEXA scan results for the cohort before and after the 8-wk exercise training period

|                     | Pretraining period raw values (kg) | Pretraining period (% of total body mass) | Posttraining period (% of total body mass) | <i>P</i> value |
|---------------------|------------------------------------|-------------------------------------------|--------------------------------------------|----------------|
| N                   | 14                                 | 14                                        | 14                                         |                |
| Total fat mass      | 39.66 ± 11.58                      | 47.07 ± 5.23                              | 46.50 ± 5.84                               | 0.378          |
| Trunk lean mass     | 17.28 ± 5.62                       | 22.18 ± 3.26                              | 22.72 ± 3.34                               | 0.177          |
| Trunk fat mass      | 17.13 ± 4.11                       | 22.44 ± 1.93                              | 22.50 ± 2.67                               | 0.875          |
| Abdominal lean mass | 6.88 ± 2.27                        | 9.93 ± 1.39                               | 9.17 ± 1.54                                | 0.414          |
| Abdominal fat mass  | 7.55 ± 1.98                        | 10.02 ± 0.90                              | 9.73 ± 1.27                                | 0.221          |
| Arms lean mass      | 4.83 ± 1.77                        | 6.37 ± 1.17                               | 6.07 ± 1.37                                | 0.272          |
| Arms fat mass       | 6.50 ± 2.48                        | 8.71 ± 2.23                               | 8.97 ± 3.12                                | 0.778          |
| Legs lean mass      | 14.31 ± 4.19                       | 18.47 ± 1.73                              | 18.62 ± 2.10                               | 0.875          |
| Legs fat mass       | 12.50 ± 3.14                       | 16.38 ± 2.41                              | 16.13 ± 2.87                               | 0.149          |



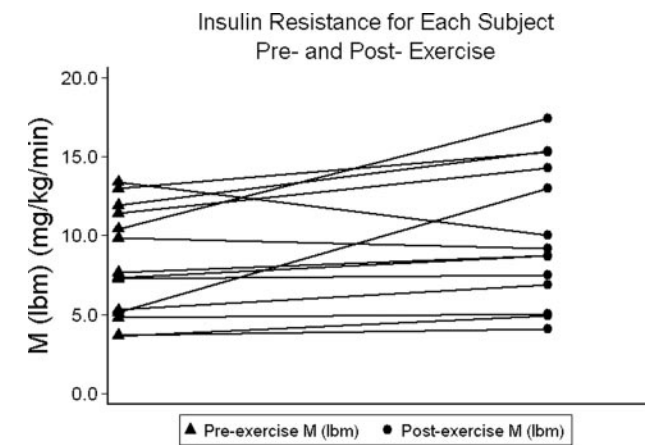

FIG. 1. Line graph of the changes in insulin resistance [ $M_{(lbm)}$ ] for each subject before and after the 8-wk exercise training period.

between  $M_{(lbm)}$   $11.80 \pm 4.02$  and  $14.26 \pm 4.33$  mg/kg·min (for low and high levels of reported physical activity respectively). They also reported that “using fasting insulin as a measure of insulin sensitivity underestimates the magnitude of the potential for physical activity to improve insulin sensitivity” (17). Other research groups have reported values in a similar range for insulin sensitivity in obese children in cross-sectional studies (23–25). There are no other published results of clamp studies investigating insulin resistance in children involved in a longitudinal repeated measures study of the impact of exercise training.

Several limitations to the present study are germane. This study involved children of both sexes and included an age range across which puberty influences insulin resistance. Ideally, separate analysis of males and females using tighter age ranges would be used. To reduce this potential error, pubertal status was assessed by Tanner staging and was clinically unchanged for the short period of the study in all subjects.

The study would have been strengthened by using a control group of nonexercising children. However, it would be difficult and perhaps unethical to recruit obese children for invasive clamp studies without offering an intervention. Alternatively, a control arm could be achieved by extending the study to 16 wk and adding an 8-wk rest period before the 8-wk exercise period. This would necessitate three clamp tests (one at commencement of the study, one at 8 wk, and one at 16 wk) and be more invasive and potentially have a greater drop-out. We considered controlling the study using a cross-over design, but this too would have necessitated

three clamp studies. Nevertheless, we think it unlikely that the improvement in insulin resistance we observed would have occurred spontaneously over an 8-wk period in subjects who remained sedentary. Although the improvement in insulin resistance we observed was independent of changes in segmental DEXA measures of fat and muscle, it is possible that changes in visceral or sc fat occurred that were not distinguished by our DEXA approach.

The medical literature is unclear as to whether obesity or a lack of fitness is the most important predictor of cardiovascular mortality and morbidity, and whether this varies between individuals. Data from adult men and women suggest that obese individuals who are fit have a lower risk of mortality compared with lean individuals who are unfit (26, 27). In addition, recent studies suggest that fitness is a stronger predictor of fasting insulin levels than fatness in overweight male middle-school children (28). The present study adds novel insight to this question, having established improvement in euglycemic-hyperinsulinemic clamp derived measures of insulin resistance, in the absence of change in DEXA measures of body composition, in response to a well-attended exercise training intervention that improved exercise capacity. Nonetheless, we concur with a recent discussion on the topic by Esposito and colleagues (29) who acknowledge that “from the standpoint of preventive medicine, the debate . . . seems largely academic”, because regular physical activity is the treatment for both obesity and poor cardiovascular fitness.

Studies that investigate the relationship between body fat and insulin resistance after exercise have shown mixed results. Some show stable body composition after an exercise training program (30, 31), whereas others report decreases in fat mass and increases in lean body mass (32, 33). Treuth *et al.* (31) studied obese girls during a 5-month resistance exercise training program and found an increase in overall body fat, but visceral fat did not increase. Insulin as measured by OGTT improved nonsignificantly, but no more sophisticated measures of insulin resistance were used (31). These changes may also depend on the type of exercise undertaken (34) (*i.e.* resistance/weight training *vs.* aerobic/cardiovascular exercise) and the length of the exercise intervention period. The subjects in this study performed circuit training, involving both types of exercise in combination and, therefore, the effects of separate types of exercise cannot be distinguished. There are currently no published studies that compare the effects of endurance *vs.* resistance exercise on body composition and insulin resistance in children.

TABLE 3. Results of blood investigations and  $M_{(lbm)}$  for the cohort before and after the 8-wk exercise training period

|                                | Preexercise       | Postexercise      | P value            |
|--------------------------------|-------------------|-------------------|--------------------|
| N                              | 14                | 14                |                    |
| $M_{(lbm)}$ (mg/kg·min)        | $8.20 \pm 3.44$   | $10.02 \pm 4.33$  | 0.019 <sup>a</sup> |
| Fasting PGL (mmol/liter)       | $4.63 \pm 0.39$   | $4.62 \pm 0.23$   | 0.893              |
| Fasting insulin (mU/liter)     | $22.23 \pm 16.27$ | $19.40 \pm 12.23$ | 0.209              |
| Total cholesterol (mmol/liter) | $3.85 \pm 1.30$   | $4.07 \pm 0.65$   | 0.937              |
| HDL (mmol/liter)               | $1.09 \pm 0.44$   | $1.13 \pm 0.31$   | 0.788              |
| LDL (mmol/liter)               | $2.18 \pm 0.82$   | $2.27 \pm 0.66$   | 0.783              |
| TG (mmol/liter)                | $1.24 \pm 0.53$   | $1.42 \pm 0.49$   | 0.583              |
| ALT (mU/liter)                 | $26.08 \pm 12.22$ | $26.00 \pm 14.30$ | 0.969              |

HDL, High-density lipoprotein; LDL, low-density lipoprotein; TG, triglycerides; ALT, alanine aminotransferase; PGL, plasma glucose level.  
<sup>a</sup>  $P \leq 0.05$ .

It is interesting that waist circumference decreased significantly over the training period whereas abdominal fat and lean mass (as measured by DEXA) did not. This is important because waist circumference is known to be linked to long-term cardiovascular risk factors. This may imply redistribution of abdominal fat or a change in the ratio of visceral fat (inside the abdominal cavity surrounding the organs) from sc or abdominal wall fat (outside the abdominal cavity). Another hypothesis is that increased abdominal tone (without changes in abdominal lean or fat mass) may be reflected in decreased waist circumference before other changes are seen.

Mixed results have been shown in the few intervention studies that have attempted to determine whether exercise programs achieve improvements in insulin resistance through changes in body composition or through improvements in fitness. Gutin *et al.* (35, 36) used aerobic exercise training programs for obese girls and showed a trend toward decreases in fasting insulin (clamp studies were not used) in the absence of changes in body fat. However, in a later study, the same group found decreases in fasting insulin together with decreases in body fat after an exercise program (37). Both studies used DEXA as the measure of body composition. Treuth *et al.* (31) used only resistance exercise but found an improvement in OGTT parameters and static visceral fat levels in the face of increasing overall body fat. Conflicting findings from a number of studies may be due to differences in study design, study populations, and outcome measures. It is likely that different causal pathways to disease may become apparent as studies use more sophisticated outcome measures. Our data suggest that fitness is an important management approach to decrease insulin resistance. The reversal of obesity-related insulin resistance may have benefits in the prevention of impaired glucose tolerance and T2DM in children.

In summary, there are many issues to be resolved in this field, most involving the metabolic pathways involved in the relationships between fitness, fatness, and insulin resistance. However, this study has shown for the first time that insulin resistance can be improved with 8 wk of exercise training in obese children at risk of the development of T2DM.

### Acknowledgments

We thank the children and families involved in this study.

Received April 5, 2007. Accepted August 7, 2007.

Address all correspondence and requests for reprints to: Dr. E. A. Davis, Princess Margaret Hospital, Roberts Road, Subiaco, Western Australia, Australia 6008. E-mail: Elizabeth.davis@health.wa.gov.au.

We acknowledge that this study was partially funded by a National Heart Foundation Project Grant.

Disclosure Statement: The authors have nothing to disclose.

### References

- Alberti G, Zimmet P, Shaw J, Bloomgarden Z, Kaufman F, Silink M 2004 Type 2 diabetes in the young: the evolving epidemic: the International Diabetes Federation consensus workshop. *Diabetes Care* 27:1798–1811
- Ehtisham S, Barrett TG, Shaw NJ 2000 Type 2 diabetes mellitus in UK children—an emerging problem. *Diabetes Med* 17:867–871
- McMahon SK, Haynes A, Ratnam N, Grant MT, Carne CL, Jones TW, Davis EA 2004 Increase in type 2 diabetes in children and adolescents in Western Australia. *MJA* 180:459–461
- Whitelaw DC, Gilbey SG 1998 Insulin resistance. *Ann Clin Bio* 35:567–583

- Reaven GM 1988 Role of insulin resistance in human disease. *Diabetes* 37:1595–1607
- Hollmann M, Runnebaum B, Gerhard I 1997 Impact of waist-hip-ratio and body-mass-index on hormonal and metabolic parameters in young, obese women. *Int J Obes* 21:476–483
- Despres JP, Lemieux S, Lamarche B, Prud'homme D, Moorjani S, Brun LD, Gagne C, Lupien PJ 1995 The insulin resistance-dyslipidemic syndrome: contribution of visceral obesity and therapeutic implications. *Int J Obes* 19(Suppl 1):S76–S86
- Ronnemaa T, Knip M, Lautala P, Viikari J, Uhari M, Leino A, Kaprio EA, Salo MK, Dahl M, Nuutinen EM 1991 Serum insulin and other cardiovascular risk indicators in children, adolescents and young adults. *Ann Med* 23:67–72
- Weiss R, Dufour S, Taksali SE, Tamborlane WV, Petersen KF, Bonadonna RC, Boselli L, Barbeta G, Allen K, Rife F, Savoye M, Dziura J, Sherwin R, Shulman GI, Caprio S 2003 Prediabetes in obese youth: a syndrome of impaired glucose tolerance, severe insulin resistance, and altered myocellular and abdominal fat partitioning. *Lancet* 362:951–957
- Csabi G, Torok K, Jeges S, Molnar D 2000 Presence of metabolic cardiovascular syndrome in obese children. *Eur J Ped* 159:91–94
- Arsanian SC 1996 Insulin sensitivity, lipids, and body composition in childhood: is “syndrome X” present? *J Clin Endocrinol Metab* 81:1058–1062
- Straczowski M, Stepień A, Kowalska I, Topolska J, Kinalska I 2003 Assessment of insulin sensitivity during exercise training program in obese women. Comparison of simple indices with hyperinsulinemic euglycemic clamp technique. *Polskie Archiwum Medycyny Wewnętrznej* 109:483–488
- Katsuki A, Sumida Y, Murashima S, Murata K, Takarada Y, Ito K, Fujii M, Tsuchihashi K, Goto H, Nakatani K, Yano Y 1998 Serum levels of tumor necrosis factor- $\alpha$  are increased in obese patients with noninsulin-dependent diabetes mellitus. *J Clin Endocrinol Metab* 83:859–862
- Bogardus C, Ravussin E, Robbins DC, Wolfe RR, Horton ES, Sims EA 1984 Effects of physical training and diet therapy on carbohydrate metabolism in patients with glucose intolerance and non-insulin-dependent diabetes mellitus. *Diabetes* 33:311–318
- Ku CY, Gower BA, Hunter GR, Goran MI 2000 Racial differences in insulin secretion and sensitivity in prepubertal children: role of physical fitness and physical activity. *Obes Res* 8:506–515
- Nemet D, Wang P, Funahashi T, Matsuzawa Y, Tanaka S, Engelman L, Cooper DM 2003 Adipocytokines, body composition, and fitness in children. *Pediatr Res* 53:148–152
- Schmitz KH, Jacobs Jr DR, Hong CP, Steinberger J, Moran A, Sinaiko AR 2002 Association of physical activity with insulin sensitivity in children. *Int J Obes* 26:1310–1316
- Rocchini AP, Katch V, Schork V, Kelch RP 1987 Insulin and blood pressure during weight loss in obese adolescents. *Hypertension* 10:267–273
- Ferguson MA, Gutin B, Le N-A, Karp W, Litaker M, Humphries M, Okuyama T, Riggs S, Owens S 1999 Effects of exercise training and its cessation on components of the insulin resistance syndrome in obese children. *Int J Obes* 23:889–895
- Cole TJ, Bellizzi MC, Flegal KM, Dietz WH 2000 Establishing a standard definition for child overweight and obesity worldwide: international survey. *BMJ* 320:1240–1243
- Centers for Disease Control and Prevention (CDC), National Center for Health Statistics (NCHS) 2004 National Health and Nutrition Examination Survey Data. Hyattsville, MD; U.S. Department of Health and Human Services
- Sunehag AL, Treuth MS, Toffolo G, Butte NF, Cobelli C, Bier DM, Haymond MW 2001 Glucose production, gluconeogenesis, and insulin sensitivity in children and adolescents: an evaluation of their reproducibility. *Pediatr Res* 50:115–123
- Moran A, Jacobs Jr DR, Steinberger J, Hong CP, Prineas R, Luepker R, Sinaiko AR 1999 Insulin resistance during puberty: results from clamp studies in 357 children. *Diabetes* 48:2039–2044
- Nguyen TT, Keil MF, Russell DL, Pathomvanich A, Uwaifo GI, Sebring NG, Reynolds JC, Yanovski JA 2001 Relation of acanthosis nigricans to hyperinsulinaemia and insulin sensitivity in overweight African American and white children. *J Pediatr* 138:474–480
- Sinaiko AR, Jacobs Jr DR, Steinberger J, Moran A, Luepker R, Rocchini AP, Prineas RJ 2001 Insulin resistance syndrome in childhood: associations of the euglycemic insulin clamp and fasting insulin with fatness and other risk factors. *J Pediatr* 139:700–707
- Wei M, Kampert JB, Barlow CE, Nichaman MZ, Gibbons LW, Paffenbarger Jr RS, Blair SN 1999 Relationship between low cardiorespiratory fitness and mortality in normal-weight, overweight, and obese men. *JAMA* 282:1547–1553
- Wessel TR, Arant CB, Olson MB, Johnson BD, Reis SE, Sharaf BL, Shaw LJ, Handberg E, Sopko G, Kelsey SF, Pepine CJ, Merz CNB 2004 Relationship of physical fitness vs body mass index with coronary artery disease and cardiovascular events in women. *JAMA* 292:1179–1187
- Allen DB, Nemeth BA, Randall Clark R, Peterson SE, Eickhoff J, Carrel AL 2007 Fitness is a stronger predictor of fasting insulin levels than fatness in overweight male middle-school children. *Pediatrics* 150:383–387
- Okita K, Nishijima H, Murakami T, Esposito K, Marfella R, Giugliano D,

- Obisesan TO, Hagberg JM 2005 Fitness versus fatness: the debate continues. *Arterioscler Thromb Vasc Biol* 25:e20–e21
30. Kelley DE, Goodpaster BH 1999 Effects of physical activity on insulin action and glucose tolerance in obesity. *Med Sci Sport Ex* 31(Suppl):S619–S623
31. Treuth MS, Hunter GR, Figueroa-Colon R, Goran MI 1998 Effects of strength training on intra-abdominal adipose tissue in obese pre-pubertal children. *Med Sci Sport Exerc* 30:1738–1743
32. Treuth MS, Ryan RE, Pratley RE, Rubin MA, Miller JP, Nicklas BJ, Sorkin J, Harman SM, Goldberg AP, Hurley BF 1994 Effects of strength training on total and regional body composition in older men. *J Appl Physiol* 77:614–620
33. Watts K, Davis EA, Jones TW, Green DJ 2005 Effect of exercise training in obese children and adolescents. *Sports Med* 35:1–18
34. Geliebter A, Maher MM, Gerace L, Gutin B, Heymsfield SB, Hashim SA 1997 Effects of strength or aerobic training on body composition, resting metabolic rate and peak oxygen consumption in obese dieting subjects. *Am J Clin Nutr* 66:557–563
35. Gutin B, Cucuzzo N, Islam S, Smith C, Stachura ME 1995 Physical training, lifestyle education and coronary risk factors in obese girls. *MSSE* 28:19–23
36. Gutin B, Cucuzzo N, Islam S, Smith C, Moffatt RJ, Pargman D 1995 Physical training improves body composition of Black obese 7- to 11-year old obese girls. *Obes Res* 3:305–312
37. Gutin B, Owens S 1999 Role of exercise intervention in improving body fat distribution and risk profile in children. *Am J Hum Biol* 11:237–247

JCEM is published monthly by The Endocrine Society (<http://www.endo-society.org>), the foremost professional society serving the endocrine community.
